# Supplementary material
Source: PubMed Central journal article supplement (PMC11288794)
Supplement: NIHMS2003022-supplement-Supplement_Data_1.pdf [file NIHMS2003022-supplement-Supplement_Data_1.pdf]

## APPENDIX: SCRIPT FOR EXIT-INTERVIEWS WITH PHARMACY CLIENTS (ENGLISH)

Evaluation ID of exit-interview: [\_\_|\_\_|\_\_|\_\_|\_\_|\_\_]

Date of interview: [\_\_|\_\_ / \_\_|\_\_ / \_\_2\_\_|0\_\_|\_\_|\_\_]

Time of Interview: Start [\_\_|\_\_:\_\_|\_\_]                      End [\_\_|\_\_:\_\_|\_\_]

Initials of interviewer: \_\_\_\_\_

Sex of informant: Male [\_\_] Female [\_\_]

### **INTRODUCTION**

*(Interviewer reads aloud)*

Thank you for taking a moment to talk about possible participation in this survey. The purpose of this survey is to gather information that may provide a better understanding of how HIV self-testing is being provided, what benefits it has, and what challenges you think exist. Your responses will be most helpful for understanding how the implementation of HIV self-testing can be improved. We hope to use this information to improve these services for the future.

To establish your eligibility in this Evaluation, we have two questions to ask you:

1. Are you 18 years old or older?
2. Have you used the pharmacy services today?

*(Patients are eligible to participate only if they answer, “yes,” to the above questions.)*

This interview has 39 questions and will take approximately 20-30 minutes. I would like to record your answers using this telephone, to help us keep track of your answers. All of the information you share is confidential, and none of your responses will be disclosed to any one at this health facility, or other agency. You can refuse to answer any of the survey questions without penalty. We do ask that any answers you do share are as honest as possible, as this will help us in understanding these issues more accurately. We appreciate your assistance today.

Before we begin, it's important that you understand what we will talk about today.

### **CONSENT**

*(Instructions for Interviewer)*

- Read the consent for the participant (or allow them to read if they prefer).
- Make sure that the participant understands the potential risks of participation and agrees to be interviewed.
- Make sure that the participant documents their consent on the consent form with either their signature or a fingerprint.
- Provide the participant with a copy of the signed/marked consent form for them to keep.
- Ask the participant, “Do you have any questions before we start the interview?”

### **SURVEY INTERVIEW**

*(Interviewer reads the following comments and questions aloud to each participant.)*

| SOCIODEMOGRAPHICS                |                                                                 |                                    |                |                                     |
|----------------------------------|-----------------------------------------------------------------|------------------------------------|----------------|-------------------------------------|
| 101                              | Sex of respondent                                               | Male                               | 1              |                                     |
|                                  |                                                                 | Female                             | 2              |                                     |
| 102                              | In what month and year were you born?                           | Month                              |                |                                     |
|                                  |                                                                 | Year                               |                |                                     |
| 103                              | Age                                                             | (years)                            |                |                                     |
| 104                              | Highest level of education                                      | Never went to school               | 0              |                                     |
|                                  |                                                                 | Alphabetization                    | 1              |                                     |
|                                  |                                                                 | Primary ("6a classe" completed)    | 2              |                                     |
|                                  |                                                                 | Secondary ("12a classe" completed) | 3              |                                     |
|                                  |                                                                 | Higher / University                | 4              |                                     |
|                                  |                                                                 | No response                        | 99             |                                     |
| 105                              | Religion                                                        | Muslim                             | 1              |                                     |
|                                  |                                                                 | Catholic                           | 2              |                                     |
|                                  |                                                                 | Protestant                         | 3              |                                     |
|                                  |                                                                 | Zion                               | 4              |                                     |
|                                  |                                                                 | Other: _____                       | 77             |                                     |
|                                  |                                                                 | No response                        | 99             |                                     |
| 106                              | Profession                                                      | Does not work (no own income )     | 1              |                                     |
|                                  |                                                                 | Agriculture                        | 3              |                                     |
|                                  |                                                                 | Trade                              | 4              |                                     |
|                                  |                                                                 | Health care worker                 | 5              |                                     |
|                                  |                                                                 | Teacher                            | 6              |                                     |
|                                  |                                                                 | Miner                              | 7              |                                     |
|                                  |                                                                 | Fisherman                          | 8              |                                     |
|                                  |                                                                 | Domestic worker (Empregada)        | 9              |                                     |
|                                  |                                                                 | Guard                              | 10             |                                     |
|                                  |                                                                 | Police                             | 11             |                                     |
|                                  |                                                                 | Other:                             | 77             |                                     |
|                                  |                                                                 | No response                        | 99             |                                     |
|                                  |                                                                 | 107                                | Marital status | Married/ officially living together |
| Divorced                         | 2                                                               |                                    |                |                                     |
| Widow                            | 3                                                               |                                    |                |                                     |
| Single (not living with partner) | 4                                                               |                                    |                |                                     |
| No response                      | 99                                                              |                                    |                |                                     |
| 108                              | Place of residence                                              | Urban                              | 1              |                                     |
|                                  |                                                                 | Rural                              | 2              |                                     |
| 109                              | What is your mother language?                                   | Portuguese                         | 1              |                                     |
|                                  |                                                                 | Elomwe                             | 2              |                                     |
|                                  |                                                                 | Chichewua                          | 3              |                                     |
|                                  |                                                                 | Manhaua                            | 4              |                                     |
|                                  |                                                                 | Muniga                             | 5              |                                     |
|                                  |                                                                 | Emakhuwa                           | 6              |                                     |
|                                  |                                                                 | Other: _____                       | 77             |                                     |
| 110                              | What is your self-evaluation on capacity of reading Portuguese? | Very good                          | 1              |                                     |
|                                  |                                                                 | Good                               | 2              |                                     |
|                                  |                                                                 | Moderate                           | 3              |                                     |
|                                  |                                                                 | Not good                           | 4              |                                     |

|                               |                                                                                    |                                                             |    |   |
|-------------------------------|------------------------------------------------------------------------------------|-------------------------------------------------------------|----|---|
|                               |                                                                                    | I can't read portuguese                                     | 0  |   |
|                               |                                                                                    | No response                                                 | 99 |   |
| 111                           | When was the last time you went to a public health facility                        | <3 months ago                                               | 1  |   |
|                               |                                                                                    | 3-5 months ago                                              | 2  |   |
|                               |                                                                                    | 6-11 months ago                                             | 3  |   |
|                               |                                                                                    | 12-23 months ago                                            | 4  |   |
|                               |                                                                                    | More than two years ago                                     | 5  |   |
|                               |                                                                                    | Don't remember                                              | 88 |   |
|                               |                                                                                    | No response                                                 | 99 |   |
| <b>POTENTIAL USE OF HIVST</b> |                                                                                    |                                                             |    |   |
| 201                           | What was your reason for the pharmacy visit                                        | Sick and wanted auto-medication                             | 1  | 0 |
|                               |                                                                                    | Came to buy medication as per prescription from a clinician | 1  | 0 |
|                               |                                                                                    | Came to buy other products than medication                  | 1  | 0 |
|                               |                                                                                    | Came to measure my weight / height                          | 1  | 0 |
|                               |                                                                                    | Came to measure blood pressure                              | 1  | 0 |
|                               |                                                                                    | Came to buy a pregnancy test                                | 1  | 0 |
|                               |                                                                                    | Other:                                                      | 77 |   |
|                               |                                                                                    | No response                                                 | 99 |   |
| 202                           | Did you see the information on HIV and HIV testing in the pharmacy                 | Yes                                                         | 1  |   |
|                               |                                                                                    | No                                                          | 0  |   |
|                               |                                                                                    | No response                                                 | 99 |   |
| 203                           | Had you seen this before in this or another pharmacy?                              | Yes                                                         | 1  |   |
|                               |                                                                                    | No                                                          | 0  |   |
|                               | If yes: where:                                                                     |                                                             |    |   |
|                               | If yes: when did you see:                                                          |                                                             |    |   |
| 204                           | Have you ever been tested for HIV                                                  | Yes                                                         | 1  |   |
|                               |                                                                                    | No (-> SKIP to 208)                                         | 0  |   |
|                               |                                                                                    | Don't want to respond                                       | 88 |   |
| 205                           | Where did you do your last test                                                    | Public Health Facility in the district I live in            | 1  |   |
|                               |                                                                                    | Public Health Facility in another district                  | 2  |   |
|                               |                                                                                    | Private clinic                                              | 3  |   |
|                               |                                                                                    | Community based HIV test                                    | 4  |   |
|                               |                                                                                    | Other: _____                                                | 77 |   |
|                               |                                                                                    | No response                                                 | 99 |   |
| 206                           | When did you do your last test                                                     | <3 months ago                                               | 1  |   |
|                               |                                                                                    | 3-5 months ago                                              | 2  |   |
|                               |                                                                                    | 6-11 months ago                                             | 3  |   |
|                               |                                                                                    | 12-23 months ago                                            | 4  |   |
|                               |                                                                                    | > 2 years ago                                               | 5  |   |
|                               |                                                                                    | Don't remember                                              | 6  |   |
|                               |                                                                                    | No response                                                 | 99 |   |
| 207                           | Do you want to reveal the result?                                                  | Yes - negative                                              | 1  |   |
|                               |                                                                                    | Yes - positive                                              | 0  |   |
|                               |                                                                                    | Yes - undetermined or invalid                               | 2  |   |
|                               |                                                                                    | No - prefer not to say                                      | 3  |   |
|                               |                                                                                    | No response                                                 | 99 |   |
| 208                           | Have you ever heard about doing na HIV yourself before seeing this in the pharmacy | Yes                                                         | 1  |   |

|     |                                                                                                                                                     |                                                                                                |    |   |
|-----|-----------------------------------------------------------------------------------------------------------------------------------------------------|------------------------------------------------------------------------------------------------|----|---|
|     |                                                                                                                                                     | No (-> SKIP to Q210)                                                                           | 0  |   |
|     |                                                                                                                                                     | No response                                                                                    | 99 |   |
| 209 | Where have you heard or seen information on doing an HIV test by yourself?                                                                          | Radio                                                                                          | 1  |   |
|     |                                                                                                                                                     | TV spot                                                                                        | 2  |   |
|     |                                                                                                                                                     | TV at the health facility                                                                      | 3  |   |
|     |                                                                                                                                                     | theatre                                                                                        | 4  |   |
|     |                                                                                                                                                     | brochure or pamphlet given to me                                                               | 5  |   |
|     |                                                                                                                                                     | Whatsapp or other multi media                                                                  | 6  |   |
|     |                                                                                                                                                     | other                                                                                          | 77 |   |
| 210 | To your opinion, what are the advantages to do self-testing? Why would you buy a self-test? (don't read the responses) (several responses possible) | Easy/simple/convenient to use/ does not need a health provider                                 | 1  | 0 |
|     |                                                                                                                                                     | Keeps confidentiality/privacy/ others will not know                                            | 1  | 0 |
|     |                                                                                                                                                     | Do not have to go to a health facility/ can do the test at home                                | 1  | 0 |
|     |                                                                                                                                                     | Result is fast                                                                                 | 1  | 0 |
|     |                                                                                                                                                     | No need to travel to health facility                                                           | 1  | 0 |
|     |                                                                                                                                                     | To be able to test together with my partner                                                    | 1  | 0 |
|     |                                                                                                                                                     | Other: _____                                                                                   | 77 |   |
|     |                                                                                                                                                     | No response                                                                                    | 99 |   |
| 211 | Of the responses you gave, what is the main one?                                                                                                    |                                                                                                |    |   |
| 212 | To your opinion, what are the disadvantages of self-testing for HIV? Why would you not buy? (don't read responses) (several responses possible)     | Fear of test result                                                                            | 1  | 0 |
|     |                                                                                                                                                     | Fear that somebody will discover my HIV self-test in my home/place of work and I will get hurt | 1  | 0 |
|     |                                                                                                                                                     | Don't know how to use it                                                                       | 1  | 0 |
|     |                                                                                                                                                     | No counseling nearby                                                                           | 1  | 0 |
|     |                                                                                                                                                     | Don't feel at risk for HIV                                                                     | 1  | 0 |
|     |                                                                                                                                                     | Don't know where to go in case HIV positive                                                    | 1  | 0 |
|     |                                                                                                                                                     | Don't know where to buy                                                                        | 1  | 0 |
|     |                                                                                                                                                     | Too expensive                                                                                  | 1  | 0 |
|     |                                                                                                                                                     | Not able to read the instructions                                                              | 1  | 0 |
|     |                                                                                                                                                     | Doubts on the quality of the test (fake)                                                       | 1  | 0 |
|     |                                                                                                                                                     | Other: _____                                                                                   | 77 |   |
|     |                                                                                                                                                     | No response                                                                                    | 99 |   |
| 213 | Of the responses you gave, what is the main one?                                                                                                    |                                                                                                |    |   |
| 214 | To your opinion, would you be scared that your partner could potentially harm you if he/she finds out you bought/did an HIV test at home?           | Yes                                                                                            | 1  |   |
|     |                                                                                                                                                     | No                                                                                             | 0  |   |
|     |                                                                                                                                                     | maybe                                                                                          | 2  |   |
|     |                                                                                                                                                     | Don't know                                                                                     | 88 |   |
|     |                                                                                                                                                     | No response                                                                                    | 99 |   |

|                                                                                       |                                                                                                                                                     |                              |    |   |
|---------------------------------------------------------------------------------------|-----------------------------------------------------------------------------------------------------------------------------------------------------|------------------------------|----|---|
| 215                                                                                   | There exists HIV tests that you can do yourself that are oral and other where you do a finger-prick. Would you prefer an oral test or a blood test? | Oral                         | 1  |   |
|                                                                                       |                                                                                                                                                     | Blood                        | 2  |   |
|                                                                                       |                                                                                                                                                     | Any of them                  | 3  |   |
|                                                                                       |                                                                                                                                                     | Don't know / no response     | 99 |   |
| 216                                                                                   | Do you think the pharmacy is a good place to get the HIV self-test?                                                                                 | Yes                          | 1  | 0 |
|                                                                                       |                                                                                                                                                     | No                           | 1  | 0 |
|                                                                                       |                                                                                                                                                     | Don't know / no response     | 99 |   |
| 217                                                                                   | To your opinion, what would be the preferred place to obtain a self-test for HIV? (only one response)                                               | Public health facility       | 1  |   |
|                                                                                       |                                                                                                                                                     | Private health facility      | 2  |   |
|                                                                                       |                                                                                                                                                     | NGO                          | 3  |   |
|                                                                                       |                                                                                                                                                     | Community clinic / outreach  | 4  |   |
|                                                                                       |                                                                                                                                                     | Private pharmacy             | 5  |   |
|                                                                                       |                                                                                                                                                     | Public pharmacy              | 6  |   |
|                                                                                       |                                                                                                                                                     | Community health care worker | 7  |   |
|                                                                                       |                                                                                                                                                     | Community leader             | 8  |   |
|                                                                                       |                                                                                                                                                     | Traditional healer           | 9  |   |
|                                                                                       |                                                                                                                                                     | Traditional birth attendant  | 10 |   |
|                                                                                       |                                                                                                                                                     | Local market/shop            | 11 |   |
|                                                                                       |                                                                                                                                                     | Other:                       | 77 |   |
|                                                                                       | No response                                                                                                                                         | 99                           |    |   |
| 218                                                                                   | Why would you prefer that place?                                                                                                                    |                              |    |   |
| 219                                                                                   | Do you know how much the HIV self-test costs in this pharmacy?                                                                                      | Yes: _____ MZN               | 1  | 0 |
|                                                                                       |                                                                                                                                                     | No                           | 1  | 0 |
| <b><i>Before proceeding to the next question, explain that the price is 50MZN</i></b> |                                                                                                                                                     |                              |    |   |
| 220                                                                                   | What did you think of the price for the test?                                                                                                       | Very cheap                   | 1  | 0 |
|                                                                                       |                                                                                                                                                     | Cheap                        | 1  | 0 |
|                                                                                       |                                                                                                                                                     | Just affordable              | 1  | 0 |
|                                                                                       |                                                                                                                                                     | Expensive                    | 1  | 0 |
|                                                                                       |                                                                                                                                                     | No response                  | 99 |   |
| 221                                                                                   | How much would you be willing to pay for a HIV self test (MZN)?                                                                                     | 0 MZN                        | 1  | 0 |
|                                                                                       |                                                                                                                                                     | Up to 10 MZN                 | 1  | 0 |
|                                                                                       |                                                                                                                                                     | Up to 50 MZN                 | 1  | 0 |
|                                                                                       |                                                                                                                                                     | Up to 100 MZN                | 1  | 0 |
|                                                                                       |                                                                                                                                                     | Up to 200 MZN                | 1  | 0 |
|                                                                                       |                                                                                                                                                     | Up to 500 MZN                | 1  | 0 |
|                                                                                       |                                                                                                                                                     | More than 500 MZN            | 1  | 0 |

|     |                                                                                                             |                                                   |    |   |
|-----|-------------------------------------------------------------------------------------------------------------|---------------------------------------------------|----|---|
|     |                                                                                                             | No response                                       | 99 |   |
| 222 | Do you think the pharmacy is a good place to get counseling on HIV?                                         | Yes                                               | 1  |   |
|     |                                                                                                             | No                                                | 0  |   |
|     |                                                                                                             | Don't know                                        | 3  |   |
|     |                                                                                                             | No response                                       | 99 |   |
| 223 | Where would you be most comfortable in getting counseling before doing the self-test?                       | At the pharmacy where you can buy the test        | 1  | 0 |
|     |                                                                                                             | At the health facility                            | 1  | 0 |
|     |                                                                                                             | Community health care worker                      | 1  | 0 |
|     |                                                                                                             | Other:                                            | 77 |   |
|     |                                                                                                             | No response                                       | 99 |   |
| 224 | Where would you be most comfortable in getting counseling after doing the self-test? (don't read responses) | Public health facility                            | 1  | 0 |
|     |                                                                                                             | Private health facility                           | 1  | 0 |
|     |                                                                                                             | NGO                                               | 1  | 0 |
|     |                                                                                                             | Community clinic / outreach                       | 1  | 0 |
|     |                                                                                                             | At the pharmacy where you can buy the test        | 1  | 0 |
|     |                                                                                                             | Public pharmacy                                   | 1  | 0 |
|     |                                                                                                             | Community health care worker                      | 1  | 0 |
|     |                                                                                                             | Community leader                                  | 1  | 0 |
|     |                                                                                                             | Traditional healer                                | 1  | 0 |
|     |                                                                                                             | Traditional birth attendant                       | 1  | 0 |
|     |                                                                                                             | Local market/shop                                 | 1  | 0 |
|     |                                                                                                             | Other:                                            | 77 |   |
| 225 | Where would you go after you did the test and result is positive (don't read responses)                     | Public health facility (name: _____)              | 1  | 0 |
|     |                                                                                                             | Private health facility                           | 1  | 0 |
|     |                                                                                                             | NGO                                               | 1  | 0 |
|     |                                                                                                             | Community health care worker                      | 1  | 0 |
|     |                                                                                                             | Private pharmacy                                  | 1  | 0 |
|     |                                                                                                             | Public pharmacy                                   | 1  | 0 |
|     |                                                                                                             | Community leader                                  | 1  | 0 |
|     |                                                                                                             | Traditional healer                                | 1  | 0 |
|     |                                                                                                             | Traditional birth attendant                       | 1  | 0 |
|     |                                                                                                             | Other:                                            | 77 |   |
| 226 | What would you do after you did the test and result is negative? (don't read responses)                     | Nothing, if the test is negative then all is fine | 1  | 0 |
|     |                                                                                                             | Go to public health facility for advice           | 1  | 0 |
|     |                                                                                                             | Go to private clinic for advice                   | 1  | 0 |
|     |                                                                                                             | Go to traditional healer                          | 1  | 0 |
|     |                                                                                                             | Go to community health care worker                | 1  | 0 |
|     |                                                                                                             | Buy another test                                  | 1  | 0 |
|     |                                                                                                             | Other:                                            | 77 |   |

|            |                                                                                                                                                                       |                       |    |  |
|------------|-----------------------------------------------------------------------------------------------------------------------------------------------------------------------|-----------------------|----|--|
|            |                                                                                                                                                                       | No response           | 99 |  |
| 227        | Did you buy a test kit at your pharmacy visit?                                                                                                                        | Yes                   | 1  |  |
|            |                                                                                                                                                                       | No                    | 0  |  |
|            |                                                                                                                                                                       | Don't want to respond | 2  |  |
| 228        | Would you buy the test for somebody else?                                                                                                                             | Yes                   | 1  |  |
|            |                                                                                                                                                                       | No                    | 0  |  |
|            |                                                                                                                                                                       | maybe                 | 2  |  |
|            |                                                                                                                                                                       | I don't know          | 88 |  |
|            |                                                                                                                                                                       | No response           | 99 |  |
| <b>End</b> |                                                                                                                                                                       |                       |    |  |
| 301        | We have now come to the end of the interview. Please give me one or two comments/questions [if any], that you would like to raise regarding what we have talked about |                       |    |  |

Thank you for your participation!
