# Supplementary material
Source: PubMed Central journal article supplement (PMC11288794)
Supplement: NIHMS2003022-supplement-Supplement_Data_2.pdf [file NIHMS2003022-supplement-Supplement_Data_2.pdf]

## APPENDIX: SCRIPT FOR INTERVIEW WITH PHARMACY CLIENTS WHO PURCHASED A KIT (ENGLISH)

Evaluation ID of pharmacy interview: [\_\_|\_\_|\_\_|\_\_|\_\_|\_\_]

Date of interview: [\_\_|\_\_|\_\_ / \_\_|\_\_|\_\_ / 20\_\_|\_\_|\_\_]

Time of Interview: Start [\_\_|\_\_:\_\_|\_\_]                      End [\_\_|\_\_:\_\_|\_\_]

Initials of interviewer: \_\_\_\_\_

Sex of informant: Male [\_\_] Female [\_\_]

### **INTRODUCTION**

*(Interviewer reads aloud)*

Thank you for taking a moment to talk about possible participation in this survey. The purpose of this interview is to gather information that may provide a better understanding of how HIV self-testing is being provided, what benefits it brings, what challenges you think the pharmacy or clients have. We also would like to understand your satisfaction of buying a kit. Your responses will be most helpful for understanding how the implementation of HIV self-testing can be improved. We hope to use this information to improve these services for the future.

To establish your eligibility in this Evaluation, we have three questions to ask you:

1. Are you 18 years of age or older?
2. Have you been to one of the private/public pharmacies and purchased an HIV self-test?
3. If yes, at which of the following pharmacies? (choose from list of participating pharmacies that will be programmed into survey)

*(Patients are eligible to participate only if they answer, “yes,” to the above questions.)*

This interview has 64 questions and will take approximately 30-40 minutes. I would like to record your answers using this telephone, to help us keep track of your answers. All of the information you share is confidential, and none of your responses will be disclosed to any one at this health facility, or other agency. You can refuse to answer any of the survey questions without penalty. We do ask that any answers you do share are as honest as possible, as this will help us in understanding these issues more accurately. We appreciate your assistance today.

Before we begin, it's important that you understand what we will talk about today.

### **CONSENT**

*(Instructions for Interviewer)*

- Read the consent for the participant (or allow them to read if they prefer).
- Make sure that the participant understands the potential risks of participation and agrees to be interviewed.
- Make sure that the participant documents their consent on the consent form with either their signature or a fingerprint.
- Provide the participant with a copy of the signed/marked consent form for them to keep.
- Ask the participant, “Do you have any questions before we start the interview?”

### **SURVEY INTERVIEW**

*(Interviewer reads the following comments and questions aloud to each participant.)*

| SOCIODEMOGRAPHICS |                                                                 |                                     |    |  |
|-------------------|-----------------------------------------------------------------|-------------------------------------|----|--|
| 101               | Sex of respondent                                               | Male                                | 1  |  |
|                   |                                                                 | Female                              | 2  |  |
| 102               | In what month and year were you born?                           | Month                               |    |  |
|                   |                                                                 | Year                                |    |  |
| 103               | Age                                                             | (years)                             |    |  |
| 104               | Highest level of education                                      | Never went to school                | 0  |  |
|                   |                                                                 | Alphabetization                     | 1  |  |
|                   |                                                                 | Primary ("6a classe" completed)     | 2  |  |
|                   |                                                                 | Secondary ("12a classe" completed)  | 3  |  |
|                   |                                                                 | Higher / University                 | 4  |  |
|                   |                                                                 | No response                         | 99 |  |
| 105               | Religion                                                        | Muslim                              | 1  |  |
|                   |                                                                 | Catholic                            | 2  |  |
|                   |                                                                 | Protestant                          | 3  |  |
|                   |                                                                 | Zion                                | 4  |  |
|                   |                                                                 | Other: _____                        | 77 |  |
|                   |                                                                 | No response                         | 99 |  |
| 106               | Profession                                                      | Does not work (no own income )      | 1  |  |
|                   |                                                                 | Agriculture                         | 3  |  |
|                   |                                                                 | Trade                               | 4  |  |
|                   |                                                                 | Health care worker                  | 5  |  |
|                   |                                                                 | Teacher                             | 6  |  |
|                   |                                                                 | Miner                               | 7  |  |
|                   |                                                                 | Fisherman                           | 8  |  |
|                   |                                                                 | Domestic worker (Empregada)         | 9  |  |
|                   |                                                                 | Guard                               | 10 |  |
|                   |                                                                 | Police                              | 11 |  |
|                   |                                                                 | Other:                              | 77 |  |
|                   |                                                                 | No response                         | 99 |  |
| 107               | Marital status                                                  | Married/ officially living together | 1  |  |
|                   |                                                                 | Divorced                            | 2  |  |
|                   |                                                                 | Widow                               | 3  |  |
|                   |                                                                 | Single (not living with partner)    | 4  |  |
|                   |                                                                 | No response                         | 99 |  |
| 108               | Place of residence                                              | Urban                               | 1  |  |
|                   |                                                                 | Rural                               | 2  |  |
| 109               | What is your mother language?                                   | Portuguese                          | 1  |  |
|                   |                                                                 | Elomwe                              | 2  |  |
|                   |                                                                 | Chichewua                           | 3  |  |
|                   |                                                                 | Manhaua                             | 4  |  |
|                   |                                                                 | Muniga                              | 5  |  |
|                   |                                                                 | Emakhuwa                            | 6  |  |
| Other: _____      | 77                                                              |                                     |    |  |
| 110               | What is your self-evaluation on capacity of reading Portuguese? | Very good                           | 1  |  |

|                              |                                                                                                     |                                                             |    |   |
|------------------------------|-----------------------------------------------------------------------------------------------------|-------------------------------------------------------------|----|---|
|                              |                                                                                                     | Good                                                        | 2  |   |
|                              |                                                                                                     | Moderate                                                    | 3  |   |
|                              |                                                                                                     | Not good                                                    | 4  |   |
|                              |                                                                                                     | I can't read Portuguese                                     | 0  |   |
|                              |                                                                                                     | No response                                                 | 99 |   |
| 111                          | When was the last time you went to a public health facility                                         | <3 months ago                                               | 1  |   |
|                              |                                                                                                     | 3-5 months ago                                              | 2  |   |
|                              |                                                                                                     | 6-11 months ago                                             | 3  |   |
|                              |                                                                                                     | 12-23 months ago                                            | 4  |   |
|                              |                                                                                                     | More than two years ago                                     | 5  |   |
|                              |                                                                                                     | Don't remember                                              | 88 |   |
|                              |                                                                                                     | No response                                                 | 99 |   |
| <b>PURCHASE OF SELF-TEST</b> |                                                                                                     |                                                             |    |   |
| 201                          | Do you remember the reason why you went to the pharmacy on the date you bought a self-test for HIV? | Sick and wanted auto-medication                             | 1  | 0 |
|                              |                                                                                                     | Came to buy medication as per prescription from a clinician | 1  | 0 |
|                              |                                                                                                     | Came to buy other products than medication                  | 1  | 0 |
|                              |                                                                                                     | Came to measure my weight / height                          | 1  | 0 |
|                              |                                                                                                     | Came to measure blood pressure                              | 1  | 0 |
|                              |                                                                                                     | Came to buy a self-test                                     | 1  | 0 |
|                              |                                                                                                     | Came to buy a pregnancy test                                | 1  | 0 |
|                              |                                                                                                     | Other:                                                      | 77 |   |
|                              |                                                                                                     | Don't remember                                              | 88 |   |
|                              |                                                                                                     | No response                                                 | 99 |   |
| 202                          | In which pharmacy did you buy a self-test?                                                          |                                                             |    |   |
| 203                          | Have you ever done an HIV test before you bought a self-test?                                       | Yes                                                         | 1  |   |
|                              |                                                                                                     | No                                                          | 0  |   |
|                              |                                                                                                     | Don't want to respond                                       | 88 |   |
| 204                          | Where did you do the last HIV test (not including self-testing)?                                    | Public health facility                                      | 1  | 0 |
|                              |                                                                                                     | Private clinic                                              | 1  | 0 |
|                              |                                                                                                     | NGO                                                         | 1  | 0 |
|                              |                                                                                                     | VCT                                                         | 1  | 0 |
|                              |                                                                                                     | Mobile clinic                                               | 1  | 0 |
|                              |                                                                                                     | community health worker                                     | 1  | 0 |
|                              |                                                                                                     | Other: _____                                                | 77 |   |
|                              |                                                                                                     | No response                                                 | 99 |   |
| 205                          | When did you do your last HIV test (not including self-testing)?                                    | <3 months ago                                               | 1  |   |
|                              |                                                                                                     | 3-5 months ago                                              | 2  |   |
|                              |                                                                                                     | 6-11 months ago                                             | 3  |   |
|                              |                                                                                                     | 12-23 months ago                                            | 4  |   |
|                              |                                                                                                     | > 2 years ago                                               | 5  |   |
|                              |                                                                                                     | Don't remember                                              | 88 |   |
|                              |                                                                                                     | No response                                                 | 99 |   |
| 206                          | Do you want to reveal the result of that last test?                                                 | Yes - negative                                              | 1  |   |
|                              |                                                                                                     | Yes - positive                                              | 0  |   |
|                              |                                                                                                     | Yes - undetermined or invalid                               | 2  |   |
|                              |                                                                                                     | No - prefer not to say                                      | 3  |   |

|                                                                                                                     |                                                                                                                      |                                                                                                |    |   |
|---------------------------------------------------------------------------------------------------------------------|----------------------------------------------------------------------------------------------------------------------|------------------------------------------------------------------------------------------------|----|---|
|                                                                                                                     |                                                                                                                      | No response                                                                                    | 99 |   |
| <b>You have bought a HIV self-test in one of the pharmacies. We would like to know what you thought about this.</b> |                                                                                                                      |                                                                                                |    |   |
| 207                                                                                                                 | Had you ever heard about doing an HIV yourself before seeing this in the pharmacy                                    | Yes                                                                                            | 1  |   |
|                                                                                                                     |                                                                                                                      | No                                                                                             | 0  |   |
|                                                                                                                     |                                                                                                                      | No response                                                                                    | 99 |   |
| 208                                                                                                                 | Where have you heard or seen information on doing an HIV test by yourself?                                           | Radio                                                                                          | 1  |   |
|                                                                                                                     |                                                                                                                      | TV spot                                                                                        | 2  |   |
|                                                                                                                     |                                                                                                                      | TV at the health facility                                                                      | 3  |   |
|                                                                                                                     |                                                                                                                      | theatre                                                                                        | 4  |   |
|                                                                                                                     |                                                                                                                      | brochure or pamphlet given to me                                                               | 5  |   |
|                                                                                                                     |                                                                                                                      | Whatsapp or other multi media                                                                  | 6  |   |
|                                                                                                                     |                                                                                                                      | other                                                                                          | 77 |   |
| 209                                                                                                                 | To your opinion, what are the advantages to do self-testing (don't read the responses)                               | Easy/simple/convenient to use/ does not need a health provider                                 | 1  | 0 |
|                                                                                                                     |                                                                                                                      | Keeps confidentiality/privacy/ others will not know                                            | 1  | 0 |
|                                                                                                                     |                                                                                                                      | Do not have to go to a health facility/ can do the test at home                                | 1  | 0 |
|                                                                                                                     |                                                                                                                      | Result is fast                                                                                 | 1  | 0 |
|                                                                                                                     |                                                                                                                      | No need to travel to health facility                                                           | 1  | 0 |
|                                                                                                                     |                                                                                                                      | To be able to test together with my partner                                                    | 1  | 0 |
|                                                                                                                     |                                                                                                                      | Other: _____                                                                                   | 77 |   |
| 210                                                                                                                 | Of the responses you gave, what is the main one?                                                                     |                                                                                                |    |   |
|                                                                                                                     |                                                                                                                      |                                                                                                |    |   |
| 211                                                                                                                 | To your opinion, what are the disadvantages of self-testing for HIV? (don't read responses)                          | Fear of test result                                                                            | 1  | 0 |
|                                                                                                                     |                                                                                                                      | Fear that somebody will discover my HIV self-test in my home/place of work and I will get hurt | 1  | 0 |
|                                                                                                                     |                                                                                                                      | Don't know how to use it                                                                       | 1  | 0 |
|                                                                                                                     |                                                                                                                      | No counseling nearby                                                                           | 1  | 0 |
|                                                                                                                     |                                                                                                                      | Don't feel at risk for HIV                                                                     | 1  | 0 |
|                                                                                                                     |                                                                                                                      | Don't know where to go in case HIV positive                                                    | 1  | 0 |
|                                                                                                                     |                                                                                                                      | Don't know where to buy                                                                        | 1  | 0 |
|                                                                                                                     |                                                                                                                      | Too expensive                                                                                  | 1  | 0 |
|                                                                                                                     |                                                                                                                      | Not able to read the instructions                                                              | 1  | 0 |
|                                                                                                                     |                                                                                                                      | Doubts on the quality of the test (fake)                                                       | 1  | 0 |
|                                                                                                                     |                                                                                                                      | Other: _____                                                                                   | 77 |   |
| 212                                                                                                                 | Of the responses you gave, what is the main one?                                                                     |                                                                                                |    |   |
|                                                                                                                     |                                                                                                                      |                                                                                                |    |   |
| 213                                                                                                                 | Were you scared that your partner could potentially harm you if he/she finds out you bought/did an HIV test at home? | Yes                                                                                            | 1  |   |
|                                                                                                                     |                                                                                                                      | No                                                                                             | 0  |   |
|                                                                                                                     |                                                                                                                      | maybe                                                                                          | 2  |   |

|     |                                                                                                                                                                                                                |                                            |    |   |
|-----|----------------------------------------------------------------------------------------------------------------------------------------------------------------------------------------------------------------|--------------------------------------------|----|---|
|     |                                                                                                                                                                                                                | Don't know                                 | 88 |   |
|     |                                                                                                                                                                                                                | No response                                | 99 |   |
| 214 | Besides the HIV test that you bought and is an oral test you can do yourself, there are also self-tests that you can do through a finger prink. For the future, would you prefer an oral test or a blood test? | Oral                                       | 1  |   |
|     |                                                                                                                                                                                                                | Blood                                      | 2  |   |
|     |                                                                                                                                                                                                                | Any of them                                | 3  |   |
|     |                                                                                                                                                                                                                | Don't know / no response                   | 99 |   |
| 215 | Do you think the pharmacy is a good place to get the HIV self-test                                                                                                                                             | Yes                                        | 1  | 0 |
|     |                                                                                                                                                                                                                | No                                         | 1  | 0 |
|     |                                                                                                                                                                                                                | Don't know / no response                   | 99 |   |
| 216 | To your opinion, what would be the preferred place to obtain a self-test for HIV? (ony one response)                                                                                                           | Public health facility                     | 1  |   |
|     |                                                                                                                                                                                                                | Private health facility                    | 2  |   |
|     |                                                                                                                                                                                                                | NGO                                        | 3  |   |
|     |                                                                                                                                                                                                                | Community clinic / outreach                | 4  |   |
|     |                                                                                                                                                                                                                | Private pharmacy                           | 5  |   |
|     |                                                                                                                                                                                                                | Public pharmacy                            | 6  |   |
|     |                                                                                                                                                                                                                | Community health care worker               | 7  |   |
|     |                                                                                                                                                                                                                | Community leader                           | 8  |   |
|     |                                                                                                                                                                                                                | Traditional healer                         | 9  |   |
|     |                                                                                                                                                                                                                | Traditional birth attendant                | 10 |   |
|     |                                                                                                                                                                                                                | Local market/shop                          | 11 |   |
|     |                                                                                                                                                                                                                | Other:<br>_____                            | 77 |   |
|     |                                                                                                                                                                                                                | Don't know / no response                   | 88 |   |
| 217 | Why would you prefer that place?                                                                                                                                                                               |                                            |    |   |
| 218 | What did you think of the price for the test?                                                                                                                                                                  | Very cheap                                 | 1  | 0 |
|     |                                                                                                                                                                                                                | Cheap                                      | 1  | 0 |
|     |                                                                                                                                                                                                                | Just affordable                            | 1  | 0 |
|     |                                                                                                                                                                                                                | Expensive                                  | 1  | 0 |
|     |                                                                                                                                                                                                                | No response                                | 99 |   |
| 219 | How much would you be willing to pay for a HIV self-test (MZN)?                                                                                                                                                | 0 MZN                                      | 1  |   |
|     |                                                                                                                                                                                                                | Up to 10 MZN                               | 2  |   |
|     |                                                                                                                                                                                                                | Up to 50 MZN                               | 3  |   |
|     |                                                                                                                                                                                                                | Up to 100 MZN                              | 4  |   |
|     |                                                                                                                                                                                                                | Up to 200 MZN                              | 5  |   |
|     |                                                                                                                                                                                                                | Up to 500 MZN                              | 6  |   |
|     |                                                                                                                                                                                                                | More than 500 MZN                          | 7  |   |
|     |                                                                                                                                                                                                                | No response                                | 99 |   |
| 220 | Do you think the pharmacy is a good place to get counseling on HIV                                                                                                                                             | Yes                                        | 1  |   |
|     |                                                                                                                                                                                                                | No                                         | 0  |   |
|     |                                                                                                                                                                                                                | Don't know                                 | 3  |   |
|     |                                                                                                                                                                                                                | No response                                | 99 |   |
| 221 | Where would you be most comfortable in getting counseling before doing the self-test?                                                                                                                          | At the pharmacy where you can buy the test | 1  | 0 |
|     |                                                                                                                                                                                                                | At the health facility                     | 1  | 0 |

|                                               |                                                                                                             |                                                              |    |   |
|-----------------------------------------------|-------------------------------------------------------------------------------------------------------------|--------------------------------------------------------------|----|---|
|                                               |                                                                                                             | Community health care worker                                 | 1  | 0 |
|                                               |                                                                                                             | Other:                                                       | 77 |   |
|                                               |                                                                                                             | No response                                                  | 99 |   |
| 222                                           | Where would you be most comfortable in getting counseling after doing the self-test? (don't read responses) | Public health facility                                       | 1  | 0 |
|                                               |                                                                                                             | Private health facility                                      | 1  | 0 |
|                                               |                                                                                                             | NGO                                                          | 1  | 0 |
|                                               |                                                                                                             | Community clinic / outreach                                  | 1  | 0 |
|                                               |                                                                                                             | At the pharmacy where you can buy the test                   | 1  | 0 |
|                                               |                                                                                                             | Public pharmacy                                              | 1  | 0 |
|                                               |                                                                                                             | Community health care worker                                 | 1  | 0 |
|                                               |                                                                                                             | Community leader                                             | 1  | 0 |
|                                               |                                                                                                             | Traditional healer                                           | 1  | 0 |
|                                               |                                                                                                             | Traditional birth attendant                                  | 1  | 0 |
|                                               |                                                                                                             | Local market/shop                                            | 1  | 0 |
|                                               |                                                                                                             | Other:                                                       | 77 |   |
|                                               |                                                                                                             | No response                                                  | 99 |   |
| 223                                           | Would you buy the test for somebody else?                                                                   | Yes                                                          | 1  |   |
|                                               |                                                                                                             | No                                                           | 0  |   |
|                                               |                                                                                                             | maybe                                                        | 2  |   |
|                                               |                                                                                                             | I don't know                                                 | 88 |   |
|                                               |                                                                                                             | No response                                                  | 99 |   |
| 224                                           | <i>Did you do the HIV test?</i>                                                                             | Yes                                                          | 1  |   |
|                                               |                                                                                                             | No (SKIP TO 501)                                             | 0  |   |
| <b>PARTICIPANTS WHO DID THE HIV SELF TEST</b> |                                                                                                             |                                                              |    |   |
| 301                                           | What was the date you did the test                                                                          | ____/____/____ (day-month-year)                              |    |   |
|                                               |                                                                                                             | Within the week after buying the test                        | 1  |   |
|                                               |                                                                                                             | More than a week but less than a month after buying the test | 2  |   |
|                                               |                                                                                                             | Don't remember                                               | 88 |   |
| 302                                           | Did you do the test alone or with somebody                                                                  | Alone                                                        | 1  |   |
|                                               |                                                                                                             | With sexual partner                                          | 2  |   |
|                                               |                                                                                                             | With a family member or friend                               | 3  |   |
|                                               |                                                                                                             | With a community counselor                                   | 4  |   |
|                                               |                                                                                                             | With a health care professional                              | 5  |   |
|                                               |                                                                                                             | With the pharmacist where test purchased                     | 6  |   |
|                                               |                                                                                                             | With somebody else: _____                                    | 77 |   |
|                                               |                                                                                                             | No response                                                  | 99 |   |
| 303                                           | Do you feel you received sufficient information about how to do the test?                                   | Yes                                                          | 1  |   |
|                                               |                                                                                                             | No                                                           | 0  |   |
|                                               |                                                                                                             | Don't know / no response                                     | 88 |   |
| 304                                           | How did you feel before taking the test?                                                                    | Very anxious                                                 | 1  |   |
|                                               |                                                                                                             | A little bit anxious                                         | 2  |   |
|                                               |                                                                                                             | Not anxious at all                                           | 3  |   |
|                                               |                                                                                                             | No response                                                  | 99 |   |
| 305                                           | How did you feel after having done the test?                                                                | Very anxious                                                 | 1  |   |
|                                               |                                                                                                             | A little bit anxious                                         | 2  |   |

|     |                                                                                             |                                                                    |    |   |
|-----|---------------------------------------------------------------------------------------------|--------------------------------------------------------------------|----|---|
|     |                                                                                             | Not anxious at all                                                 | 3  |   |
|     |                                                                                             | No response                                                        | 99 |   |
| 306 | How understandable were the instructions of the kit?                                        | Very easy                                                          | 1  |   |
|     |                                                                                             | Easy                                                               | 2  |   |
|     |                                                                                             | Difficult                                                          | 3  |   |
|     |                                                                                             | Very difficult                                                     | 4  |   |
|     |                                                                                             | No response                                                        | 99 |   |
| 307 | How difficult or easy was it to read the text of the instructions?                          | Very easy                                                          | 1  |   |
|     |                                                                                             | Easy                                                               | 2  |   |
|     |                                                                                             | Difficult                                                          | 3  |   |
|     |                                                                                             | Very difficult                                                     | 4  |   |
|     |                                                                                             | No response                                                        | 99 |   |
| 308 | How difficult or easy was it to do the test?                                                | Very easy                                                          | 1  |   |
|     |                                                                                             | Easy                                                               | 2  |   |
|     |                                                                                             | Difficult                                                          | 3  |   |
|     |                                                                                             | Very difficult                                                     | 4  |   |
|     |                                                                                             | No response                                                        | 99 |   |
| 309 | What steps were the most difficult?                                                         | Step 1 - preparing the kit                                         | 1  |   |
|     |                                                                                             | Step 2 - taking the sample                                         | 2  |   |
|     |                                                                                             | Step 3 - doing the test                                            | 3  |   |
|     |                                                                                             | Step 4 - reading the results                                       | 4  |   |
|     |                                                                                             | No response                                                        | 99 |   |
| 310 | Do you feel you have done the test correctly?                                               | Yes                                                                | 1  |   |
|     |                                                                                             | No                                                                 | 0  |   |
|     |                                                                                             | Don't know                                                         | 88 |   |
|     |                                                                                             | No response                                                        | 99 |   |
| 311 | Did you trust the results of the test you did?                                              | Yes                                                                | 1  |   |
|     |                                                                                             | No                                                                 | 0  |   |
|     |                                                                                             | Don't know                                                         |    |   |
|     |                                                                                             | No response                                                        | 88 |   |
| 312 | Do you feel you needed additional information or counseling before you did the test?        | Yes                                                                | 1  |   |
|     |                                                                                             | No                                                                 | 0  |   |
|     |                                                                                             | Don't know                                                         |    |   |
|     |                                                                                             | No response                                                        | 88 |   |
| 313 | How was the information given before you bought the test and on the information in the kit? | Sufficient                                                         | 1  |   |
|     |                                                                                             | Not sufficient                                                     | 0  |   |
|     |                                                                                             | Don't know                                                         |    |   |
|     |                                                                                             | No response                                                        | 88 |   |
| 314 | Would you prefer to do the self-test alone or with the help of somebody?                    | Unassisted HIV self-testing (alone)                                | 1  | 0 |
|     |                                                                                             | Assisted HIV self-testing (with counselor) at home                 | 1  | 0 |
|     |                                                                                             | Assisted HIV self-testing (with counselor) at pharmacy             | 1  | 0 |
|     |                                                                                             | Assisted HIV self-testing (with counselor) at health facility      | 1  | 0 |
|     |                                                                                             | Assisted HIV self-testing (with counselor) at another place: _____ | 77 |   |

|                                |                                                                                                                                  |                                                    |    |   |
|--------------------------------|----------------------------------------------------------------------------------------------------------------------------------|----------------------------------------------------|----|---|
|                                |                                                                                                                                  | No response                                        | 99 |   |
| 315                            | Would you recommend somebody to do the HIV self-test?                                                                            | Yes                                                | 1  |   |
|                                |                                                                                                                                  | No                                                 | 0  |   |
|                                |                                                                                                                                  | No response                                        | 99 |   |
| 316                            | Would you prefer to do a HIV self-test rather than going to a VCT unit?                                                          | Yes                                                | 1  | 0 |
|                                |                                                                                                                                  | No                                                 | 1  | 0 |
|                                |                                                                                                                                  | Don't know                                         | 88 |   |
|                                |                                                                                                                                  | No response                                        | 99 |   |
| 317                            | Why / Why not?                                                                                                                   |                                                    |    |   |
| 318                            | Would you test again using an HIV self-test kit?                                                                                 | Yes                                                | 1  |   |
|                                |                                                                                                                                  | No                                                 | 0  |   |
|                                |                                                                                                                                  | Don't know                                         | 88 |   |
|                                |                                                                                                                                  | No response                                        | 99 |   |
| 319                            | Why/ why not?                                                                                                                    |                                                    |    |   |
| <b>LINKING TO VCT and CARE</b> |                                                                                                                                  |                                                    |    |   |
| 401                            | Have you gone to a clinic/health facility for VCT after you bought the self-test? (independent of the HIV result)                | Yes                                                |    |   |
|                                |                                                                                                                                  | No (SKIP TO Q409)                                  |    |   |
|                                |                                                                                                                                  | No response                                        | 99 |   |
| 403                            | How long did it take from the moment of the result of the self-test until you went to a clinic/health facility?                  | I went on the same day                             | 1  |   |
|                                |                                                                                                                                  | 1 day later                                        | 2  |   |
|                                |                                                                                                                                  | 2-7 days (within 1 week)                           | 3  |   |
|                                |                                                                                                                                  | 1-4 weeks                                          | 4  |   |
|                                |                                                                                                                                  | More than a month                                  | 5  |   |
|                                |                                                                                                                                  | Don't remember/ no response                        | 99 |   |
| 404                            | How long did you have to wait at the VCT to receive counseling and testing?                                                      | Less than 15 minutes                               | 1  |   |
|                                |                                                                                                                                  | Between 15 minutes and 1 hour                      | 2  |   |
|                                |                                                                                                                                  | Between 1 and 2 hours                              | 3  |   |
|                                |                                                                                                                                  | Between 2 and 5 hours                              | 4  |   |
|                                |                                                                                                                                  | Was asked to come back one day later               | 5  |   |
|                                |                                                                                                                                  | Don't remember/ no response                        | 99 |   |
| 405                            | Did you feel the staff at the health facility had sufficient knowledge about self-testing in order to give the care you need?    | Yes                                                | 1  |   |
|                                |                                                                                                                                  | No, they could not respond to some of my questions | 0  |   |
|                                |                                                                                                                                  | No response                                        | 99 |   |
| 406                            | Do you want to reveal the result of the self-test?                                                                               | Yes - negative                                     | 1  |   |
|                                |                                                                                                                                  | Yes – positive                                     | 0  |   |
|                                |                                                                                                                                  | Yes – undetermined or invalid                      | 2  |   |
|                                |                                                                                                                                  | No – prefer not to say                             | 3  |   |
| 407                            | Do you want to reveal the result of the test done at VCT?                                                                        | Yes - negative                                     | 1  |   |
|                                |                                                                                                                                  | Yes – positive                                     | 0  |   |
|                                |                                                                                                                                  | Yes – undetermined or invalid                      | 2  |   |
|                                |                                                                                                                                  | No – prefer not to say                             | 3  |   |
| 408                            | ONLY WHEN 407 POSITIVE: How fast were you registered at the HIV clinic after you had a confirmation test at the health facility? | Same day                                           | 1  |   |
|                                |                                                                                                                                  | One day later                                      | 2  |   |



|                                                                   |                                                                                                                                                                                                                                                             |                                                     |    |   |
|-------------------------------------------------------------------|-------------------------------------------------------------------------------------------------------------------------------------------------------------------------------------------------------------------------------------------------------------|-----------------------------------------------------|----|---|
|                                                                   |                                                                                                                                                                                                                                                             | 2-7 days (within 1 week)                            | 3  |   |
|                                                                   |                                                                                                                                                                                                                                                             | 1-4 weeks                                           | 4  |   |
|                                                                   |                                                                                                                                                                                                                                                             | More than 1 month                                   | 5  |   |
|                                                                   |                                                                                                                                                                                                                                                             | Don't remember/ no response                         | 99 |   |
| 409                                                               | Why have you not gone to the clinic/health facility?                                                                                                                                                                                                        | Stigma/ fear of somebody finding out of test result | 1  | 0 |
|                                                                   |                                                                                                                                                                                                                                                             | Test is negative                                    | 1  | 0 |
|                                                                   |                                                                                                                                                                                                                                                             | Anxious/ panicking                                  | 1  | 0 |
|                                                                   |                                                                                                                                                                                                                                                             | Don't feel sick                                     | 1  | 0 |
|                                                                   |                                                                                                                                                                                                                                                             | Family did not let me go to the health facility     | 1  | 0 |
|                                                                   |                                                                                                                                                                                                                                                             | Don't know where to go in case HIV positive         | 1  | 0 |
|                                                                   |                                                                                                                                                                                                                                                             | Doubts on the quality of the test (fake)            | 1  | 0 |
|                                                                   |                                                                                                                                                                                                                                                             | Still planning to go but had no time yet            | 77 |   |
|                                                                   |                                                                                                                                                                                                                                                             | Don't remember/ no response                         | 99 |   |
| <b>PARTICIPANTS WHO DID NOT DO THE SELF-TEST (BUT BOUGHT ONE)</b> |                                                                                                                                                                                                                                                             |                                                     |    |   |
| 501                                                               | Why did you not do the HIV self-test? Probe: fear of test result; did not remember how to use; no counseling; don't feel at risk; don't know where to go after the test; did not have time yet; not able to read the instructions; doubt on quality of test |                                                     |    |   |
| <b>END</b>                                                        |                                                                                                                                                                                                                                                             |                                                     |    |   |
| 601                                                               | We have now come to the end of the interview. Please give me one or two comments/questions [if any], that you would like to raise regarding what we have talked about                                                                                       |                                                     |    |   |

Thank you very much for your participation!
